# Supplementary material
Source: HighWire-hosted journal article supplement (https://bmjopen.bmj.com/content/13/4/e063969)
Supplement: inline-supplementary-material-4 [file inline-supplementary-material-4.pdf]

## Supplementary file 3. Summary of systematic reviews

| Author                               | Title                                                                                                                                        | Study Design                             | Included Articles N. | Follow-up Time              | Fatigue Prevalence & Associations                                                                                           | p |
|--------------------------------------|----------------------------------------------------------------------------------------------------------------------------------------------|------------------------------------------|----------------------|-----------------------------|-----------------------------------------------------------------------------------------------------------------------------|---|
| Aiyegbusi et al. (2021)              | Symptoms, complications and management of long COVID: a review                                                                               | Systematic review & Meta-analysis        | 24                   | 1 month                     | 47% (CI 31–63)<br>16 studies                                                                                                |   |
| Badenoch et al. (2021)               | Persistent neuropsychiatric symptoms after COVID-19: a systematic review and meta-analysis                                                   | Systematic review & Meta-analysis        | 51                   | Mean 77 days (Range 14-182) | 24.4% (CI 17.5-32.9)                                                                                                        |   |
| Cabera Martimbianco et al. (2021)    | Frequency, signs and symptoms, and criteria adopted for long COVID-19: A systematic review                                                   | Narrative systematic review              | 25                   | Post-infection or discharge | -                                                                                                                           |   |
| Cares-Marambio et al. (2021)         | Prevalence of long-term effects in individuals diagnosed with COVID-19: a living systematic review                                           | Systematic review & Meta-analysis        | 9                    | Post-discharge              | 52% (CI 0.38–0.66)                                                                                                          |   |
| Cha & Baek et al. (2021)             | Symptoms and management of long COVID: A scoping review                                                                                      | Scoping review                           | 34                   | > 4 weeks                   | -                                                                                                                           |   |
| Chen et al. (2021)                   | Global Prevalence of Post-Acute Sequelae of COVID-19 (PASC) or Long COVID: A Meta-Analysis and Systematic Review                             | Systematic review & Meta-analysis        | 40                   | > 28 days                   | <b>Total (22 studies)</b><br>23 (CI 0.13-0.38)<br><b>Hospitalised (8 studies)</b><br>26 (CI 0.17-0.38)                      |   |
| Domingo et al. (2021)                | Prevalence of long-term effects in individuals diagnosed with COVID-19: a living systematic review                                           | Living systematic review & Meta-analysis | 36                   | 4-12 weeks<br>≥ 12 weeks    | <b>4-12 weeks</b><br>51%, (CI: 39-64)<br><b>≥ 12 weeks</b><br>47%, (CI: 27-68)                                              |   |
| Falk et al. (2021)                   | Health-related quality of life issues, including symptoms, in patients with active COVID-19 or post COVID-19; a systematic literature review | Narrative systematic review              | 339                  | 1-4 months post-discharge   | -                                                                                                                           |   |
| Fernandez-de-Las-Penas et al. (2021) | Prevalence of post-COVID-19 symptoms in hospitalized and non-hospitalized COVID-19 survivors: A systematic review and meta-analysis          | Systematic review & Meta-analysis        | 33                   | 30, 60, 90 days post-virus  | <b>30 days</b><br>11.7% (CI 3.1-35.3)<br><b>60 days</b><br>56.2% (CI 28.3-80.7)<br><b>≥ 90 days</b><br>35.3% (CI 25.3-46.8) |   |
| Garg et al. (2021)                   | The Conundrum of 'Long-COVID-19': A Narrative Review                                                                                         | Systematic Review                        | 212                  | -                           | -                                                                                                                           |   |
| Gavriatopoulou et al. (2021)         | Epidemiology and organ specific sequelae of post-acute COVID 19: A narrative review                                                          | Narrative Systematic review              | 12                   | > 4 weeks                   | -                                                                                                                           |   |

| Author                        | Title                                                                                                                                                                        | Study Design                              | Included Articles N. | Follow-up Time               | Fatigue Prevalence & Associations                                                                                    | p    |
|-------------------------------|------------------------------------------------------------------------------------------------------------------------------------------------------------------------------|-------------------------------------------|----------------------|------------------------------|----------------------------------------------------------------------------------------------------------------------|------|
| Hoshijima et al. (2021)       | Incidence of Long-term Post-acute Sequelae of SARS-CoV-2 Infection Related to Pain and Other Symptoms: A Living Systematic Review and Meta-analysis                          | Systematic review & Meta-analysis (RAPID) | 35                   | 1 month                      | 45% (32-59%)                                                                                                         |      |
| Jennings et al. (2021)        | A systematic review of persistent symptoms and residual abnormal functioning following acute COVID-19: Ongoing symptomatic phase vs. post-COVID-19 syndrome                  | Systematic review & Meta-analysis         | 39                   | > 4 weeks                    | <b>Symptoms (16 studies)</b><br>44% (CI 10-71)<br><b>Ongoing Symptoms (19 studies)</b><br>43% (CI 5-83)              |      |
| Long et al. (2021)            | Follow-Ups on Persistent Symptoms and Pulmonary Function Among Post-Acute COVID-19 Patients: A Systematic Review and Meta-Analysis                                           | Systematic review & Meta-analysis         | 16                   | > 1 month<br>Post-discharge  | 47%                                                                                                                  |      |
| Malik et al. (2021)           | Post-acute COVID-19 syndrome (PCS) and health-related quality of life (HRQoL)—A systematic review and meta-analysis                                                          | Systematic review & Meta-analysis         | 22                   | Post-Covid                   | <b>Pooled Total</b><br>64%<br><b>Quality of life</b><br>OR 1.06                                                      | .001 |
| Nasserie et al. (2021)        | Assessment of the Frequency and Variety of Persistent Symptoms Among Patients With COVID-19: A Systematic Review                                                             | Systematic review                         | 45                   | 2 months                     | Median 39.8% (IQR, 31.4-59.0%)<br>25 studies                                                                         |      |
| Poudel et al. (2021)          | Impact of Covid-19 on health-related quality of life of patients: A structured review                                                                                        | Rapid review                              | 12                   | > 4 weeks post-discharge     | -                                                                                                                    |      |
| Rao et al. (2021)             | Fatigue symptoms associated with COVID-19 in convalescent or recovered COVID-19 patients; a systematic review and meta-analysis                                              | Systematic review & Meta-analysis         | 41                   | 1-6 months<br>Post-infection | <b>1-2 months</b><br>52.7%<br>ER 0.517<br><b>2-3 months</b><br>47.8%<br>ER 0.527<br><b>Female Gender</b><br>OR 1.782 |      |
| Rogers et al. (2020)          | Psychiatric and neuropsychiatric presentations associated with severe coronavirus infections: A systematic review and meta-analysis with comparison to the COVID-19 pandemic | Meta-analysis                             | 4                    | Post-illness                 | 61 (19.3%)                                                                                                           |      |
| Sanchez-Ramirez et al. (2021) | Long-Term Impact of COVID-19: A Systematic Review of the Literature and Meta-Analysis                                                                                        | Systematic review & Meta-analysis         | 24                   | 4 months                     | 38%<br>15 articles                                                                                                   |      |
| Shanbehzadeh et al. (2021)    | Physical and mental health complications post-Covid-19: Scoping review                                                                                                       | Scoping Systematic Review                 | 34                   | 3 months                     | -                                                                                                                    |      |

| Author             | Title                                                                                                                                                   | Study Design                | Included Articles N. | Follow-up Time | Fatigue Prevalence & Associations | p |
|--------------------|---------------------------------------------------------------------------------------------------------------------------------------------------------|-----------------------------|----------------------|----------------|-----------------------------------|---|
| Wong et al. (2021) | Long COVID and Myalgic Encephalomyelitis/Chronic Fatigue Syndrome (ME/CFS)—A Systemic Review and Comparison of Clinical Presentation and Symptomatology | Narrative systematic review | 21                   | > 1 month      | -                                 |   |
