# Supplementary material
Source: HighWire-hosted journal article supplement (https://bmjopen.bmj.com/content/13/4/e063969)

Supplementary file. 12 Funnel plots for fatigue proportions using a scale or no scale

Funnel plot for studies using a valid scale

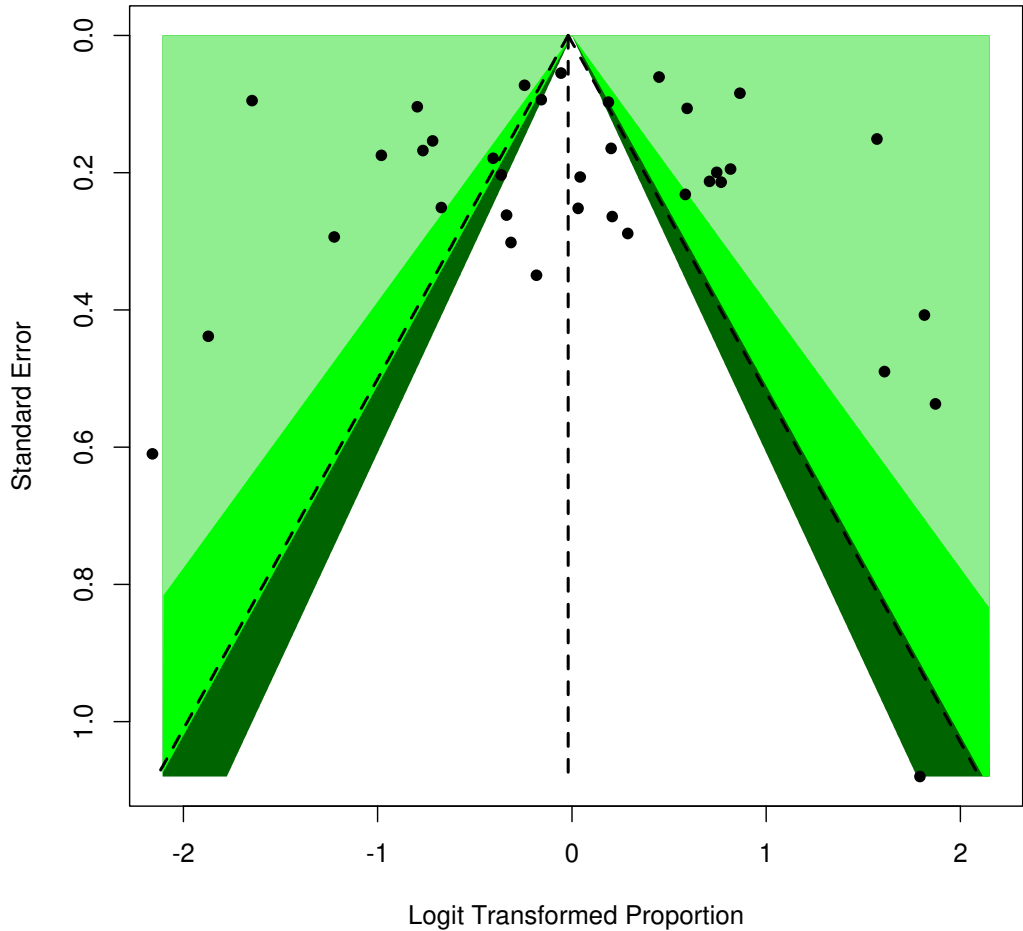

Funnel plot for studies not using a valid scale

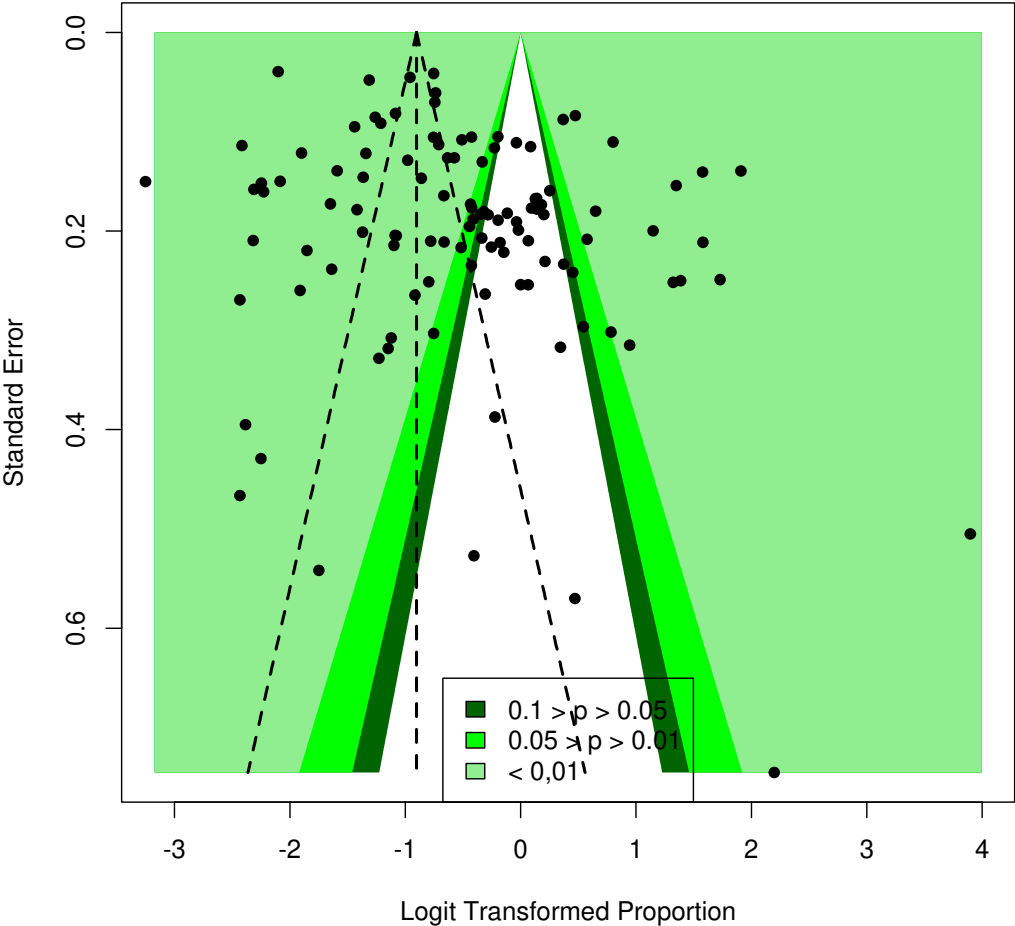

Supplement: inline-supplementary-material-13 [file inline-supplementary-material-13.pdf]
