# Supplementary material
Source: HighWire-hosted journal article supplement (https://bmjopen.bmj.com/content/13/4/e063969)

Supplementary file. 15 Funnel plot for fatigue proportions excluding unpublished articles

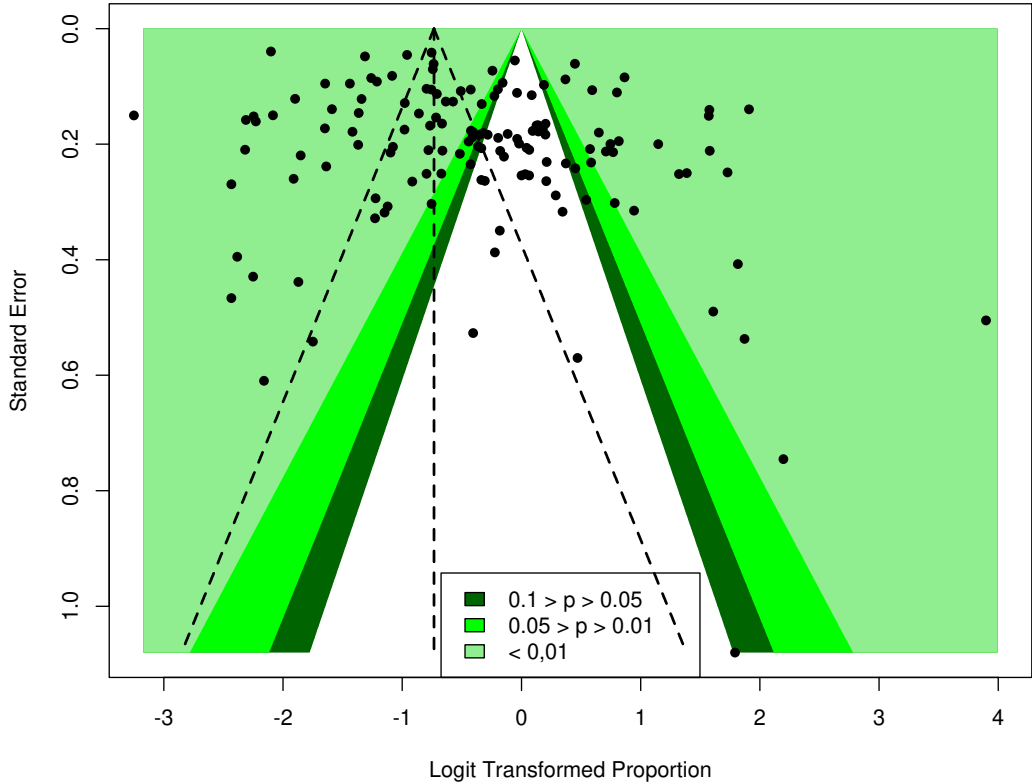

Supplement: inline-supplementary-material-16 [file inline-supplementary-material-16.pdf]
